# Supplementary material for: Efficient removal of methylene blue by water-stable anionic coordination polymer in aqueous media
Source: Royal Society of Chemistry journal article supplement (doi:10.1039/d4ce00634h), 2024-01-01
Supplement: d4ce00634h1.pdf [file d4ce00634h1.pdf]

**Efficient removal of methylene blue by water-stable anionic coordination polymer in  
aqueous media**

**Tuğba Alp Arici <sup>a,\*</sup>, Melike Şevik <sup>b</sup>, Enes Kavak <sup>b</sup>, Emrah Kavak <sup>c</sup>, Mürsel Arici <sup>b,\*</sup>**

<sup>a</sup>Department of Chemical Technology, Emet Vocational School, Kütahya Dumlupınar University, 43700, Kütahya, Türkiye

<sup>b</sup>Department of Chemistry, Faculty of Science, Eskişehir Osmangazi University, 26040 Eskişehir, Türkiye

<sup>c</sup>Science and Technology Research and Application Center (BITAM), Necmettin Erbakan University, 42100, Konya, Türkiye

**Table S1.** Selected bond distances and angles for compound **1** (Å, °)

| <b>Bond Distances</b>                 |            |                                         |             |
|---------------------------------------|------------|-----------------------------------------|-------------|
| Cd1–O1                                | 2.285 (2)  | Cd1–O3 <sup>ii</sup>                    | 2.553 (3)   |
| Cd1–O2                                | 2.636 (3)  | Cd1–O4 <sup>ii</sup>                    | 2.302 (2)   |
| Cd1–O6 <sup>i</sup>                   | 2.424 (2)  | Cd1–O8 <sup>iii</sup>                   | 2.230 (3)   |
| Cd1–O5 <sup>i</sup>                   | 2.395 (2)  |                                         |             |
| <b>Bond Angles</b>                    |            |                                         |             |
| O1–Cd1–O2                             | 52.09 (8)  | O4 <sup>ii</sup> –Cd1–O2                | 137.67 (8)  |
| O1–Cd1–O6 <sup>i</sup>                | 87.47 (9)  | O4 <sup>ii</sup> –Cd1–O6 <sup>i</sup>   | 93.07 (10)  |
| O1–Cd1–O5 <sup>i</sup>                | 130.26 (9) | O4 <sup>ii</sup> –Cd1–O5 <sup>i</sup>   | 122.14 (10) |
| O1–Cd1–O3 <sup>ii</sup>               | 137.85 (9) | O4 <sup>ii</sup> –Cd1–O3 <sup>ii</sup>  | 52.14 (9)   |
| O1–Cd1–O4 <sup>ii</sup>               | 85.74 (9)  | O8 <sup>iii</sup> –Cd1–O1               | 118.83 (11) |
| O6 <sup>i</sup> –Cd1–O2               | 82.68 (9)  | O8 <sup>iii</sup> –Cd1–O2               | 88.86 (10)  |
| O6 <sup>i</sup> –Cd1–O3 <sup>ii</sup> | 95.47 (11) | O8 <sup>iii</sup> –Cd1–O6 <sup>i</sup>  | 137.92 (9)  |
| O5 <sup>i</sup> –Cd1–O2               | 88.98 (9)  | O8 <sup>iii</sup> –Cd1–O5 <sup>i</sup>  | 84.75 (9)   |
| O5 <sup>i</sup> –Cd1–O6 <sup>i</sup>  | 54.09 (8)  | O8 <sup>iii</sup> –Cd1–O3 <sup>ii</sup> | 85.93 (12)  |
| O5 <sup>i</sup> –Cd1–O3 <sup>ii</sup> | 82.00 (10) | O8 <sup>iii</sup> –Cd1–O4 <sup>ii</sup> | 119.30 (10) |
| O3 <sup>ii</sup> –Cd1–O2              | 169.95 (8) |                                         |             |

Symmetry codes: (i) x–1, y–1, z–1; (ii) x, y–1, z; (iii) x, y–1, z–1.

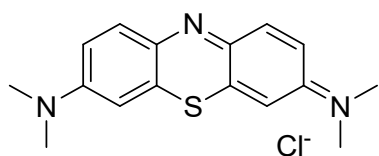

MB

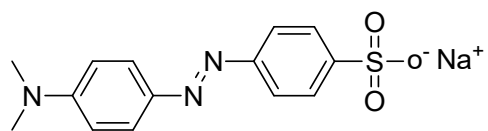

MO

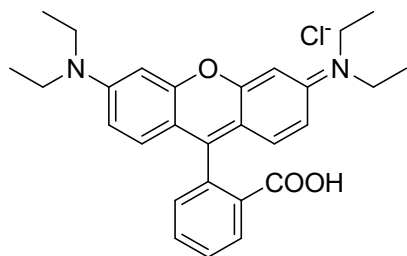

RhB

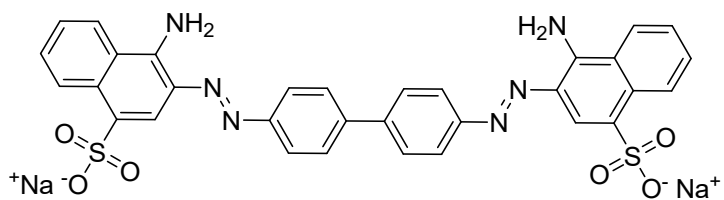

CR

**Scheme S1.** The molecular structures of the dyes used in adsorption

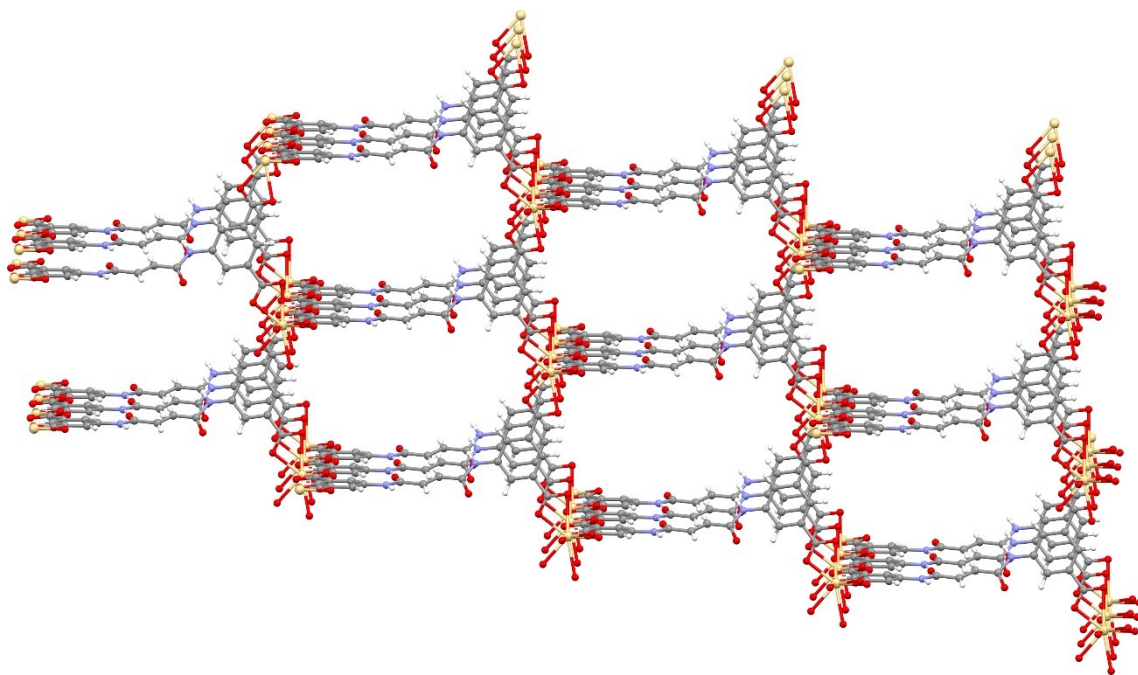

**Fig. S1.** A single 3D framework of 1 along the a-axis

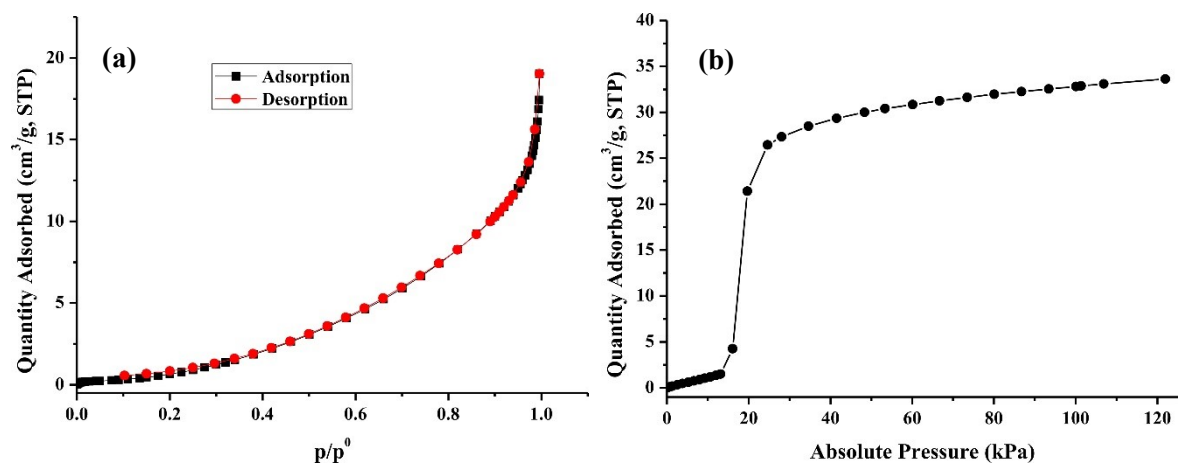

**Fig. S2.** (a)  $N_2$  adsorption-desorption isotherms of the compound at 77 K (b)  $CO_2$  adsorption isotherm of the compound at 273 K

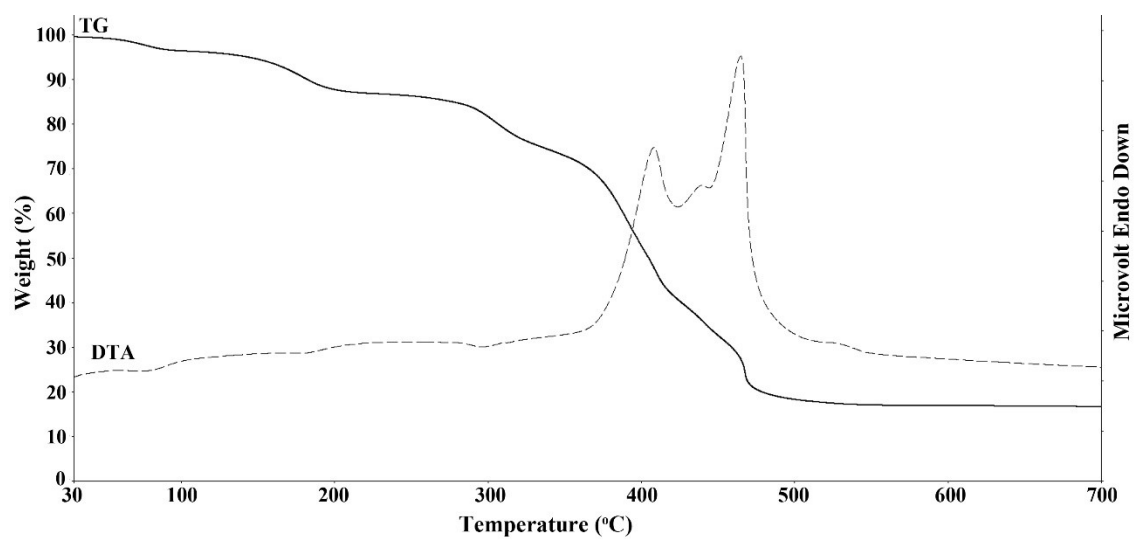

**Fig. S3.** TG/DTA curves of the compound

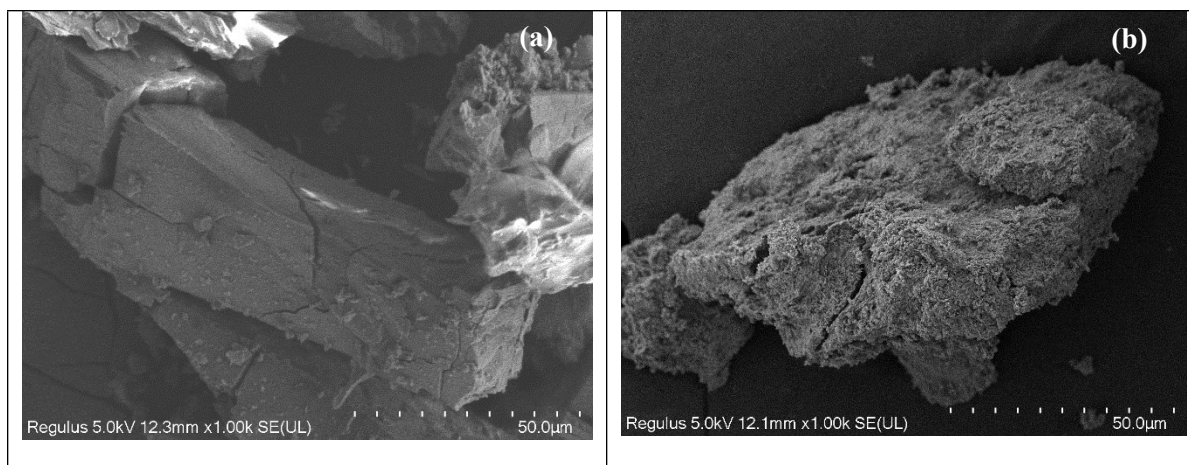

**Fig. S4.** SEM images of the compound before (a) and after MB adsorption.

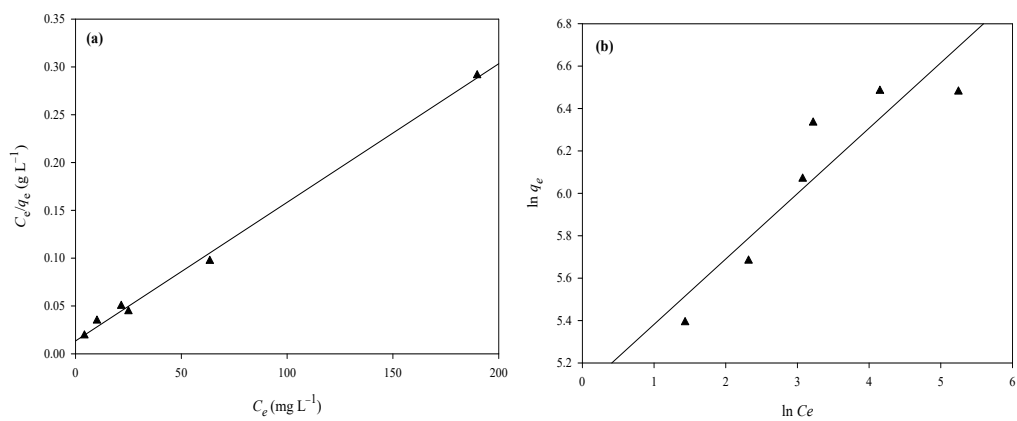

**Fig. S5.** Langmuir isotherm model (a) and Freundlich isotherm model (b) plots for the adsorption of MB.



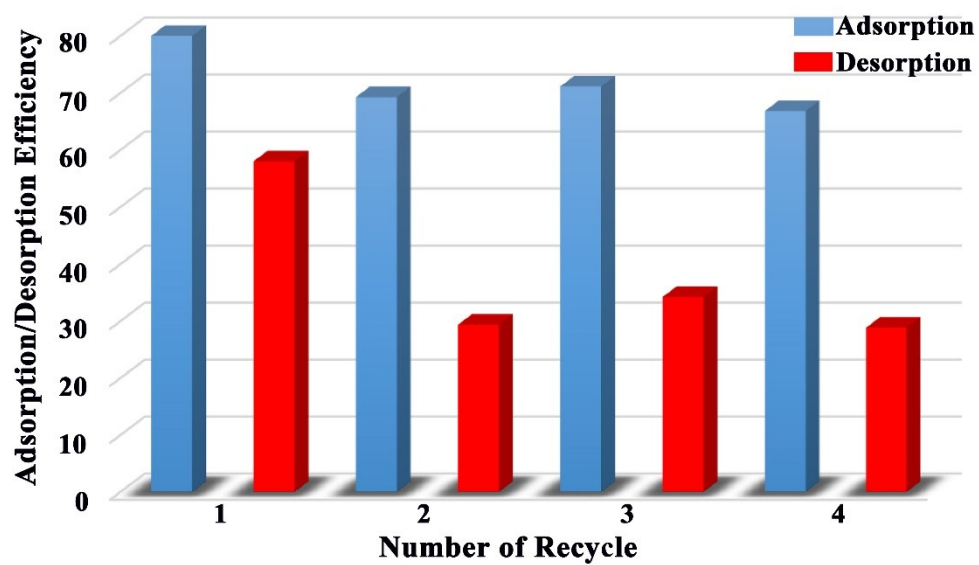

**Fig. S6.** The bar graphic of adsorption/desorption efficiency versus recycling times for MB

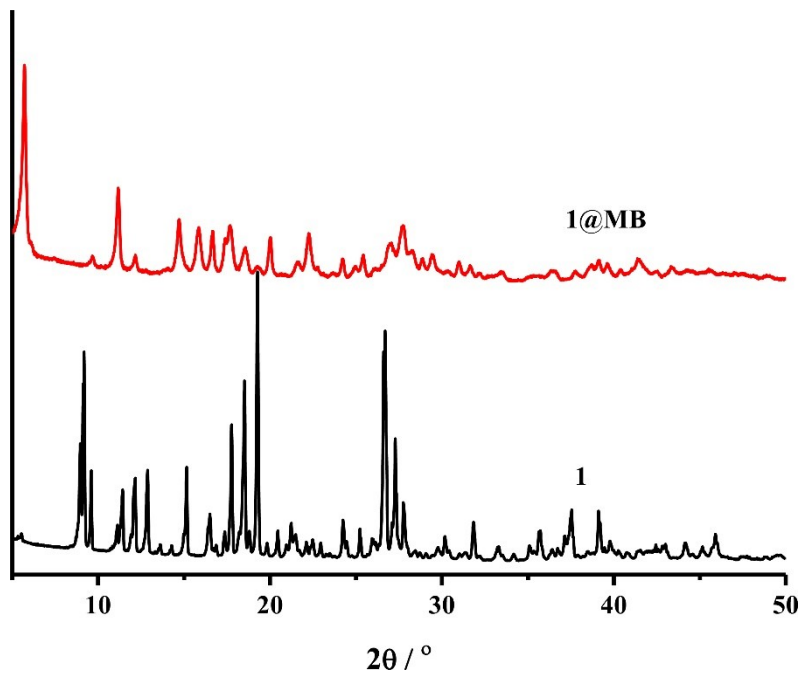

**Fig. S7.** PXRD patterns of the compound before and after MB adsorption

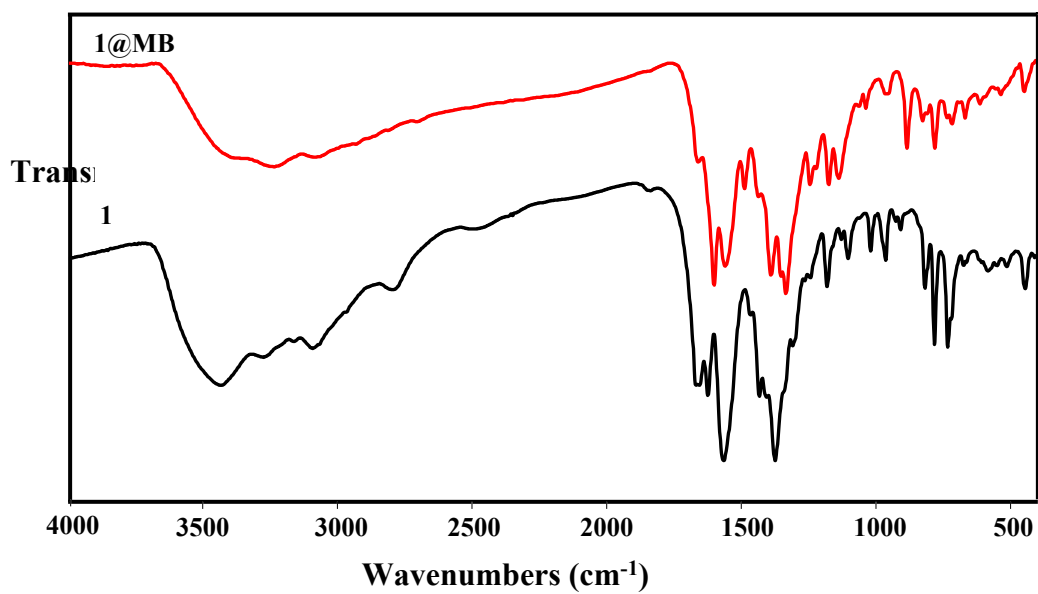

**Fig. S8.** FT-IR spectra of the compound before and after MB adsorption

**Table S2.** Comparison of maximum adsorption capacity of various adsorbents for MB.

| <b>Adsorbent</b>                                                        | <b><math>q_{max}</math> (mg g<sup>-1</sup>)</b> |                  |
|-------------------------------------------------------------------------|-------------------------------------------------|------------------|
| Er-MOF                                                                  | 494.1                                           | 1                |
| MoS <sub>2</sub> -COOH@ UiO-66-NH <sub>2</sub>                          | 253                                             | 2                |
| UiO-66-NH <sub>2</sub>                                                  | 549.6                                           | 3                |
| Cu-BTC@AG                                                               | 282.466                                         | 4                |
| Magnetic Fe <sub>3</sub> O <sub>4</sub> /PVA/CA/UiO-67<br>nanospheres   | 1371.79                                         | 5                |
| Fe <sub>3</sub> O <sub>4</sub> @SiO <sub>2</sub> @HKUST-1 (composite-1) | 434.78                                          | 6                |
| NH <sub>2</sub> -MIL-101 (Al)                                           | 762                                             | 7                |
| Cd(II)-MOF                                                              | 1004.12                                         | 8                |
| Compound 1                                                              | 689.93                                          | <b>This work</b> |

## References

- 1 M. Jiang, P.-L. Zhao, Y.-N. Yue, X.-Q. Song and L. Wang, *J. Mol. Struct.*, 2024, 138943.
- 2 K. Karami, P. Bayat, S. Javadian and M. Saraji, *J. Mol. Liq.*, 2021, **342**, 117520.
- 3 S.-W. Lv, J.-M. Liu, H. Ma, Z.-H. Wang, C.-Y. Li, N. Zhao and S. Wang, *Microporous Mesoporous Mater.*, 2019, **282**, 179–187.
- 4 Q. Fu, D. Shi, C. Mo, J. Lou, S. Zhou, L. Zha, J. Wang, W. Yan and J. Luo, *J. Solid State Chem.*, 2022, **311**, 123100.
- 5 Z. Jing, Y. Li, Q. Du, X. Pi, Y. Wang, S. Zhao and Y. Jin, *Int. J. Biol. Macromol.*, 2023, **253**, 126967.
- 6 N. Faaizatunnisa, R. Ediati, H. Fansuri, H. Juwono, S. Suprpto, A. R. P. Hidayat and L. L. Zulfa, *Nano-Structures & Nano-Objects*, 2023, **34**, 100968.
- 7 F. Ahmadijokani, R. Mohammadkhani, S. Ahmadipouya, A. Shokrgozar, M. Rezakazemi, H. Molavi, T. M. Aminabhavi and M. Arjmand, *Chem. Eng. J.*, 2020, **399**, 125346.
- 8 M. Şevik, S. M. Sezdi, E. Kavak, T. A. Arici and M. Arici, *Cryst. Growth Des.*, 2023, **23**, 5163–5172.
